# Supplementary material for: Tomato Endurance to Tuta Absoluta Is Mediated by Reinforcement of Leaf Barriers and Induction of Chemical Reaction&nbsp;
Source: Research Square preprint supplement (doi:10.21203/rs.3.rs-153409/v1), 2021-02-01

**Additional file 1**

**Tomato endurance to Tuta absoluta is mediated by reinforcement of leaf barriers and induction of chemical reaction**

**Daniela D’Esposito*, Daniele Manzo*, Alessandro Ricciardi, Antonio Pietro Garonna,Antonino De Natale, Luigi Frusciante, Francesco Pennacchio, Maria Raffaella Ercolano**

**Supplemental Table and Supplemental Figure**

**Table S1.** Number of sequenced reads before and after quality control.

| **Sample Name** | **Number of reads before data quality control** | **Number of reads after data quality control** |
| --- | --- | --- |
| Tni Rep1 | 25713821 | 24390437 |
| Tni Rep2 | 19706221 | 19069911 |
| Sni Rep1 | 22224662 | 21391274 |
| Sni Rep2 | 23663488 | 22993345 |
| Ti Rep1 | 28968237 | 27930286 |
| Ti Rep2 | 30377806 | 28976601 |
| Si Rep1 | 22486053 | 21458005 |
| Si Rep2 | 27851400 | 26308810 |

**Fig. S1.** Graph showing the number of loci in the raw data, the removed loci according to HTSFilter analysis and those retained for further analysis for the Tolerant (**a**) and Susceptible (**b**) genotypes.


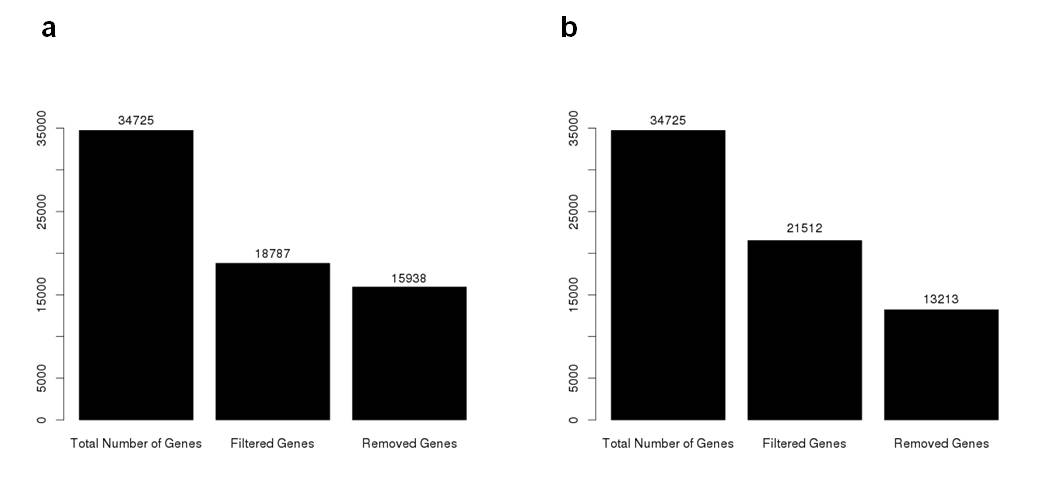

Supplement: Supplementary file 2 [file 7790ed99b47b6d8d4d1a0bfe.docx]
